- 3rd edition. Edited by Miller RD. New York, Churchill Livingstone, 1990, pp 1031-1099
- Oda M, Fukushima Y, Hirota T, Tanaka A, Aono M, Sato T: The para-carotid approach for internal jugular catheterization. *Anaesthesia* 36:896-900, 1981
  - English ICW, Frew RM, Pigott JF, Zaki M: Percutaneous catheterisation of the internal jugular vein. *Anaesthesia* 24:521-531, 1969

- Rao TLK, Wong AY, Salem MR: A new approach to percutaneous catheterization of the internal jugular vein. *ANESTHESIOLOGY* 46:362-364, 1977
- Horrow JC, Metz S, Thickman D, Frederic MW: Prior carotid surgery does not affect the reliability of landmarks for location of the internal jugular vein. *Anesth Analg* 66:452-456, 1987

(Accepted for publication March 12, 1991.)

Anesthesiology  
74:1166, 1991

## Ballistocardiography Complicating Tympanoplasty

*To the Editor:*—We recently anesthetized a healthy 9-yr-old, 30-kg boy with chronic otitis media and perforated tympanic membrane for tympanoplasty. The child underwent induction and maintenance of anesthesia with halothane, nitrous oxide, and oxygen. Intubation was performed under deep halothane anesthesia following placement of an intravenous catheter. Ventilation was controlled without a muscle relaxant. After 2.75 h, with inspired halothane at 1.2%, the nitrous oxide was discontinued in preparation for placement of the graft on the perforated tympanic membrane. Fifteen minutes after stopping the nitrous oxide, the heart rate increased from 105 to 125 beats per min without a change in blood pressure. Five minutes later the surgeon noted that there was a disruptive "bouncing" of the surgical field under the microscope. The patient had been placed with his head on what is normally the foot of the bed in order to allow the surgeons to be seated comfortably and operate with the microscope. The operating table and the microscope were checked for stability, and the table was weighted with sandbags in an attempt to damp the distracting movement under the microscope.

Upon further inspection by a senior anesthesiologist, the movement of the field was seen to coincide rhythmically with the heart rate. A ballistocardiogram, in effect, was being observed in the movement of the patient under the microscope. Since the patient had not been forcibly coupled to the operating table, his body was free to respond to cardiac ejection—*i.e.*, to produce the ballistocardiogram. The patient was given 0.5 mg/kg esmolol, which decreased the heart rate from 125 beats per min to 105 beats per min, and the distracting "bouncing" under the microscope stopped. No further  $\beta$ -adrenergic blockade was necessary because the operation finished in approximately 20 min.

Ballistocardiography was a technique employed until the early 1970s to measure cardiac output and force of contraction. In fact, it was used regularly to monitor the rejection of the cardiac homograft during early human cardiac transplantation.<sup>1</sup> The ultra-low-frequency (ULF)

ballistocardiogram is based on measuring the reactive movement of the human body caused by ejection of blood from the heart with each heart beat. The force of contraction is directly proportional to the contractile state of the heart, and in young children with healthy and efficient ventricles, the ballistocardiogram may be evident when standing on a bathroom scale (the pointer moves slightly with each heart beat) and when lying in bed at night (children may mention that the room moves rhythmically). After the nitrous oxide was discontinued, our young patient demonstrated an increase in the contractile state of the heart, which decreased his anesthetic depth and increased his cardiac contractile state. The short-acting, effective  $\beta$ -blocker esmolol alleviated this phenomenon and allowed surgery to continue unencumbered.

BRIAN J. GRONERT, M.D.  
*Assistant Professor of Anesthesiology*

JOHN A. REITAN, M.D.  
*Professor of Anesthesiology*

*Department of Anesthesiology  
University of California, Davis  
2315 Stockton Boulevard  
Sacramento, California 95817*

## REFERENCES

- Shakespeare T, Reitan JA, Smith NT, Stinson EB, Shumway NE: ULF ballistocardiography in human cardiac transplantation. *Bibl Cardiol* 27(suppl):1-9, 1971

(Accepted for publication March 12, 1991.)

Anesthesiology  
74:1166-1167, 1991

## A Complication Following Prophylactic Blood Patch: Spinal or Subdural Anesthesia?

*To the Editor:*—Leivers reports a complication, apparent total spinal anesthesia, which he attributes to the performance of a prophylactic epidural blood patch.<sup>1</sup> Leivers hypothesizes that the pressure of the epidural blood forced cephalad a sufficiently large volume of lidocaine-containing cerebrospinal fluid to produce total spinal anesthesia.

I would like to suggest subdural anesthesia as an alternate mechanism. Suppose the tip of the epidural catheter migrated into the subdural space between the penultimate and final lidocaine doses. Subdural mi-

gration may have been more likely because of the previous dural puncture.<sup>2,3</sup> The patient would then have received 10 ml 1.5% lidocaine with 1:200,000 epinephrine 37 min before the apneic episode. Leivers's case report sounds suspiciously similar to Massey Dawkin's description of "massive extradural" (*i.e.*, subdural) anesthesia: "All goes well for about 20 min. Then respiration slowly fails; the pupils dilate, but the blood pressure does not fall. . . . Assuming that 2% lidocaine was used, the patient suddenly wakes up after 1½ h, resumes breathing,
